# Supplementary material for: A simple score-based strategy to improve equity of the UK biennial diabetic eye screening protocol among people deemed as low risk
Source: Springer Nature journal article supplement (doi:10.1007/s00125-025-06379-6), 2025-03-12
Supplement: MOESM1 [file 125_2025_6379_MOESM1_ESM.pdf]

## Supplementary material

ESM Figure 1: Inclusion criteria for analysis within NELDESP

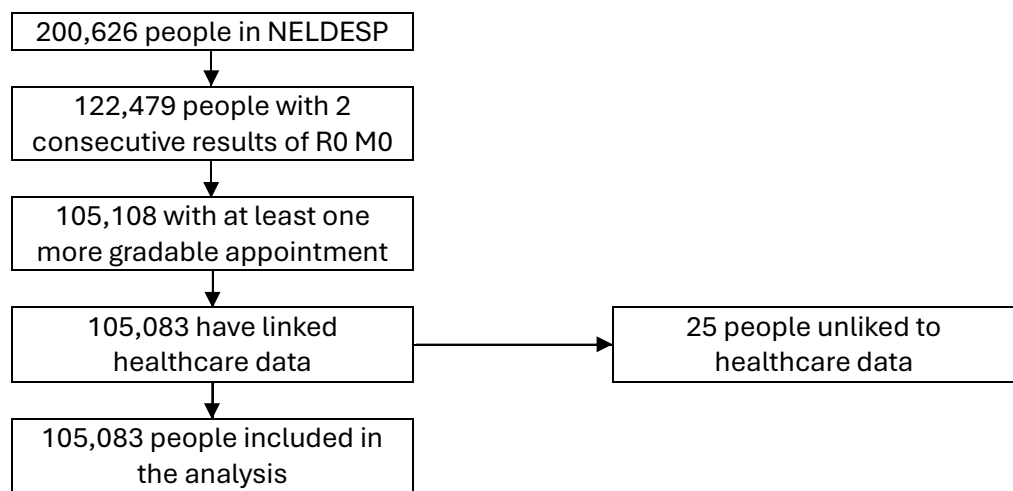

**ESM Table 1: Baseline characteristics of the NEL DESP cohort among those with no DR on two consecutive annual screening visits and another gradable appointment**

| <b>Characteristic</b>              | <b>Number of people (%)</b> |
|------------------------------------|-----------------------------|
| <b>Total</b>                       | 105,083                     |
| <b>Age categories</b>              |                             |
| <30yr                              | 2976 (2.83%)                |
| 31 to 40yr                         | 8468 (8.06%)                |
| 41 to 50yr                         | 20549 (19.56%)              |
| 51 to 60yr                         | 28234 (26.87%)              |
| 61 to 70yr                         | 23676 (22.53%)              |
| 71yr and over                      | 21180 (20.16%)              |
| <b>Sex</b>                         |                             |
| Female                             | 50152 (47.73%)              |
| Male                               | 54931 (52.27%)              |
| <b>Ethnicity</b>                   |                             |
| White                              | 38532 (36.67%)              |
| Black                              | 17170 (16.34%)              |
| South Asian                        | 38047 (36.21%)              |
| Any other Asian                    | 6922 (6.59%)                |
| Mixed                              | 1330 (1.27%)                |
| Other                              | 3082 (2.93%)                |
| <b>Duration of diabetes</b>        |                             |
| Less than 10 years                 | 87540 (83.31%)              |
| More than 10 years                 | 17543 (16.69%)              |
| <b>Type of diabetes</b>            |                             |
| Type 2                             | 100225 (95.38%)             |
| Type 1                             | 2947 (2.8%)                 |
| Other                              | 58 (0.06%)                  |
| Missing                            | 1853 (1.76%)                |
| <b>Deprivation (IMD quintiles)</b> |                             |
| 1                                  | 36365 (34.61%)              |
| 2                                  | 35129 (33.43%)              |
| 3                                  | 19393 (18.45%)              |
| 4                                  | 9388 (8.93%)                |
| 5                                  | 3434 (3.27%)                |
| Not given                          | 1374 (1.31%)                |

**ESM Table 2: Logistic prediction Model 1 using DESP covariates and no ethnicity**

| <b>Characteristic</b>                        | <b>Odds ratio (95% CI)</b>                                                 | <b>p-value</b>         | <b>Coefficient</b> |
|----------------------------------------------|----------------------------------------------------------------------------|------------------------|--------------------|
| (Intercept)                                  | $7.64 \times 10^{-13}$ ( $1 \times 10^{-15}$ , $5.82 \times 10^{-10}$ )    | $1.69 \times 10^{-16}$ | -27.9              |
| Age in years                                 | 1.97 (1.72, 2.26)                                                          | $4.52 \times 10^{-22}$ | 0.678              |
| Age <sup>a</sup>                             | $1.53 \times 10^{-23}$ ( $2.01 \times 10^{-28}$ , $1.17 \times 10^{-18}$ ) | $5.35 \times 10^{-20}$ | -52.5              |
| Time since<br>Diagnosis <sup>b</sup>         | 7170 (2020-25500)                                                          | $7 \times 10^{-43}$    | 8.88               |
| Type 1 diabetes                              | $5.46 \times 10^{-8}$ ( $4.96 \times 10^{-10}$ , $6.01 \times 10^{-6}$ )   | $3.1 \times 10^{-12}$  | -16.7              |
| Time since<br>diagnosis (days)<br>/10000     | 0.313 (0.211, 0.464)                                                       | $6.84 \times 10^{-9}$  | -1.16              |
| Previously not<br>attended an<br>appointment | 0.0156 (0.00885, 0.0275)                                                   | $5.11 \times 10^{-47}$ | -4.16              |

<sup>a</sup>Age is the transformation of (age in years/100)<sup>3</sup>

<sup>b</sup>Time since Diagnosis is the transformation of log(Time since diagnosis (days) /10000)

**ESM Table 3: Logistic prediction Model 2 using DESP covariates and ethnicity**

| <b>Characteristic</b>                  | <b>Odds ratio (95% CI)</b> | <b>p-value</b>       | <b>Coefficient</b> |
|----------------------------------------|----------------------------|----------------------|--------------------|
| (Intercept)                            | 0.0188 (0.00163, 0.217)    | 0.00146              | -3.97              |
| Age in years                           | 0.931 (0.885, 0.979)       | 0.0053               | -0.0714            |
| Age <sup>a</sup>                       | 4.11 (0.0455, 371)         | 0.539                | 1.41               |
| Time since Diagnosis <sup>b</sup>      | 4.48 (2.56, 7.84)          | 1.5x10 <sup>-7</sup> | 1.5                |
| Type 1 diabetes                        | 0.658 (0.192, 2.25)        | 0.505                | -0.419             |
| Time since diagnosis (days) /10000     | 1.33 (0.279, 6.35)         | 0.72                 | 0.285              |
| Black                                  | 1.77 (0.936, 3.33)         | 0.0792               | 0.568              |
| South Asian                            | 1.07 (0.601, 1.92)         | 0.81                 | 0.0711             |
| Other Asian                            | 1.7 (0.714, 4.04)          | 0.231                | 0.529              |
| Mixed                                  | 2.13 (0.331, 13.7)         | 0.426                | 0.755              |
| Other                                  | 4.2 (1.44, 12.3)           | 0.0088               | 1.44               |
| Previously not attended an appointment | 1.47 (1.05, 2.06)          | 0.0254               | 0.385              |

<sup>a</sup>Age is the transformation of (age in years/100)^3

<sup>b</sup>Time since Diagnosis is the transformation of log(Time since diagnosis (days) /10000)

**ESM Table 4: Logistic prediction Model 3 using DESP and Health care record covariates, excluding ethnicity**

| Characteristic                              | Odds ratio (95% CI)                                                       | p-value                | Coefficient |
|---------------------------------------------|---------------------------------------------------------------------------|------------------------|-------------|
| (Intercept)                                 | 5.55x10 <sup>-6</sup> (1.14x10 <sup>-10</sup> , 0.271)                    | 0.028                  | -12.1       |
| Age <sup>a</sup> in years                   | 1.52 (1.35, 1.71)                                                         | 2.95x10 <sup>-12</sup> | 0.421       |
| (age/100) <sup>3</sup>                      | 2.03x10 <sup>-13</sup> (1.75x10 <sup>-17</sup> , 2.36x10 <sup>-09</sup> ) | 9.35x10 <sup>-10</sup> | -29.2       |
| Time since Diagnosis <sup>b</sup>           | 8.83 (3.93, 19.9)                                                         | 1.37x10 <sup>-07</sup> | 2.18        |
| Type 1 diabetes                             | 7.03x10 <sup>-6</sup> (9.99x10 <sup>-8</sup> , 0.000494)                  | 4.55x10 <sup>-8</sup>  | -11.9       |
| Time since diagnosis (days) /10000          | 1.43 (0.0766, 26.8)                                                       | 0.81                   | 0.36        |
| Previously not attended an appointment      | 0.184 (0.117, 0.291)                                                      | 3.58x10 <sup>-13</sup> | -1.69       |
| Diastolic per mmHg                          | 0.852 (0.795, 0.913)                                                      | 6.1x10 <sup>-6</sup>   | -0.16       |
| Standard deviation of HbA1c mmol/mol values | 0.9488 (0.7517, 1.1977)                                                   | 0.658                  | -0.0526     |
| HbA1c <sup>c</sup>                          | 0.29 (0.0879, 0.957)                                                      | 0.0422                 | -1.24       |
| HbA1c <sup>d</sup>                          | 21500 (612, 754000)                                                       | 3.91x10 <sup>-8</sup>  | 9.98        |
| HbA1c <sup>e</sup>                          | 0.9942 (0.9886, 0.9998)                                                   | 0.0413                 | -0.0058     |

<sup>a</sup>Age is the transformation of (age in years/100)<sup>3</sup>

<sup>b</sup>Time since Diagnosis is the transformation of log(Time since diagnosis (days) /10000)

<sup>c</sup>HbA1c is the transformation of Median HbA1c mmol/mol / 10.929 +2.15

<sup>d</sup>HbA1c is the transformation of (Median HbA1c mmol/mol /109.29 +0.215)<sup>3</sup>

<sup>e</sup>HbA1c is the transformation of (Standard deviation of HbA1c mmol/mol values) <sup>2</sup>

**ESM Table 5: Logistic prediction Model 4 using DESP and health record covariates, including ethnicity**

| <b>Characteristic</b>                  | <b>Odds ratio (95% CI)</b>                 | <b>p-value</b>         | <b>Coefficient</b> |
|----------------------------------------|--------------------------------------------|------------------------|--------------------|
| (Intercept)                            | 0.00012 (3.52x10 <sup>-5</sup> , 0.000412) | 7.16x10 <sup>-47</sup> | -9.02              |
| Age in years                           | 0.963 (0.95, 0.977)                        | 1.26x10 <sup>-7</sup>  | -0.0377            |
| Age <sup>a</sup>                       | 19.5 (5.87, 65)                            | 1.26x10 <sup>-6</sup>  | 2.97               |
| Time since diagnosis (days) /10000     | 0.832 (0.474, 1.46)                        | 0.523                  | -0.184             |
| Time since Diagnosis <sup>b</sup>      | 1.74 (1.39, 2.17)                          | 9.81x10 <sup>-7</sup>  | 0.552              |
| Type 1 diabetes                        | 0.786 (0.551, 1.12)                        | 0.185                  | -0.24              |
| Black                                  | 2.02 (1.74, 2.35)                          | 9.76x10 <sup>-20</sup> | 0.704              |
| South Asian                            | 1.47 (1.27, 1.69)                          | 1.27x10 <sup>-07</sup> | 0.383              |
| Other Asian                            | 1.62 (1.3, 2.01)                           | 1.35x10 <sup>-5</sup>  | 0.481              |
| Mixed                                  | 1.84 (1.15, 2.94)                          | 0.0106                 | 0.61               |
| Other                                  | 1.15 (0.799, 1.64)                         | 0.457                  | 0.137              |
| Standard deviation of HbA1c            | 1.05 (1.03, 1.07)                          | 6.64x10 <sup>-7</sup>  | 0.0468             |
| HbA1c <sup>c</sup>                     | 816 (195, 3420)                            | 4.63x10 <sup>-20</sup> | 6.7                |
| Previously not attended an appointment | 1.27 (1.14, 1.41)                          | 1.44x10 <sup>-5</sup>  | 0.238              |
| diastolic                              | 1.01 (1, 1.02)                             | 0.000656               | 0.0111             |
| HbA1c <sup>d</sup>                     | 0.313 (0.18, 0.544)                        | 3.81x10 <sup>-5</sup>  | -1.16              |
| HbA1c <sup>e</sup>                     | 0.9990 (0.9985, 0.9994)                    | 8.85x10 <sup>-6</sup>  | -0.001             |

<sup>a</sup>Age is the transformation of (age in years/100)^3

<sup>b</sup>Time since Diagnosis is the transformation of log(Time since diagnosis (days) /10000)

<sup>c</sup>HbA1c is the transformation of Median HbA1c mmol/mol / 109.29 +0.215

<sup>d</sup>HbA1c is the transformation of (Median HbA1c mmol/mol /109.29 +0.215)^3

<sup>e</sup>HbA1c is the transformation of (Standard deviation of HbA1c values) ^2

**ESM Table 6: Probability of STDR diagnosis per appointment in NEL DESP**

|                                                                        | Annual                           | Biennial                       | Model 1<br>(DESP<br>excluding<br>ethnicity) | Model 2<br>(DESP<br>including<br>ethnicity) | Model 3<br>(Healthcare<br>records<br>excluding<br>ethnicity) | Model 4<br>(Healthcare<br>records<br>including<br>ethnicity) | Model 5<br>(Points<br>risk<br>Score) |
|------------------------------------------------------------------------|----------------------------------|--------------------------------|---------------------------------------------|---------------------------------------------|--------------------------------------------------------------|--------------------------------------------------------------|--------------------------------------|
| <b>Aged 41 years or older, less than 10 years duration of diabetes</b> |                                  |                                |                                             |                                             |                                                              |                                                              |                                      |
| White                                                                  | 0.00374<br>(0.00345,<br>0.00405) | 0.0104<br>(0.00962,<br>0.0113) | 0.00891<br>(0.00822,<br>0.00966)            | 0.0103<br>(0.00947,<br>0.0111)              | 0.00896<br>(0.00827,<br>0.00971)                             | 0.00911<br>(0.00841,<br>0.00988)                             | 0.0104<br>(0.00956,<br>0.0112)       |
| Black                                                                  | 0.00858<br>(0.00791,<br>0.00931) | 0.0239<br>(0.022,<br>0.0259)   | 0.0216<br>(0.0199,<br>0.0234)               | 0.0208<br>(0.0192,<br>0.0225)               | 0.0219<br>(0.0202,<br>0.0238)                                | 0.0219<br>(0.0202,<br>0.0238)                                | 0.0183<br>(0.0169,<br>0.0198)        |
| South Asian                                                            | 0.00616<br>(0.00575,<br>0.00658) | 0.0168<br>(0.0158,<br>0.018)   | 0.0152<br>(0.0142,<br>0.0163)               | 0.0158<br>(0.0148,<br>0.0169)               | 0.0152<br>(0.0142,<br>0.0163)                                | 0.0155<br>(0.0145,<br>0.0166)                                | 0.0165<br>(0.0154,<br>0.0176)        |
| Other Asian                                                            | 0.00575<br>(0.00493,<br>0.00671) | 0.0156<br>(0.0134,<br>0.0181)  | 0.0136<br>(0.0117,<br>0.0158)               | 0.0136<br>(0.0117,<br>0.0158)               | 0.0138<br>(0.0118,<br>0.016)                                 | 0.0139<br>(0.0119,<br>0.0162)                                | 0.0117<br>(0.0101,<br>0.0137)        |
| Mixed                                                                  | 0.00799<br>(0.00585,<br>0.0109)  | 0.023<br>(0.0169,<br>0.0314)   | 0.0214<br>(0.0157,<br>0.0291)               | 0.0201<br>(0.0147,<br>0.0274)               | 0.0216<br>(0.0159,<br>0.0294)                                | 0.0218<br>(0.016,<br>0.0297)                                 | 0.0188<br>(0.0138,<br>0.0256)        |
| Other                                                                  | 0.00556<br>(0.00438,<br>0.00705) | 0.0156<br>(0.0123,<br>0.0197)  | 0.0139<br>(0.011,<br>0.0176)                | 0.0105<br>(0.00827,<br>0.0133)              | 0.0138<br>(0.0109,<br>0.0175)                                | 0.0142<br>(0.0112,<br>0.0179)                                | 0.00845<br>(0.00666,<br>0.0107)      |
| <b>Aged 41 years or older, 10 years duration of diabetes or more</b>   |                                  |                                |                                             |                                             |                                                              |                                                              |                                      |
| White                                                                  | 0.00603<br>(0.00523,<br>0.00695) | 0.0166<br>(0.0144,<br>0.0191)  | 0.0101<br>(0.00881,<br>0.0117)              | 0.0129<br>(0.0112,<br>0.0149)               | 0.0101<br>(0.00877,<br>0.0116)                               | 0.0113<br>(0.00984,<br>0.0131)                               | 0.012<br>(0.0104,<br>0.0138)         |
| Black                                                                  | 0.0129<br>(0.0112,<br>0.0147)    | 0.0348<br>(0.0304,<br>0.0397)  | 0.0232<br>(0.0202,<br>0.0265)               | 0.02<br>(0.0175,<br>0.0229)                 | 0.0225<br>(0.0196,<br>0.0257)                                | 0.0256<br>(0.0224,<br>0.0293)                                | 0.0163<br>(0.0142,<br>0.0186)        |
| South Asian                                                            | 0.0124<br>(0.0113,<br>0.0137)    | 0.033<br>(0.03,<br>0.0362)     | 0.0223<br>(0.0202,<br>0.0245)               | 0.0208<br>(0.0189,<br>0.0229)               | 0.0207<br>(0.0188,<br>0.0228)                                | 0.0248<br>(0.0225,<br>0.0272)                                | 0.0225<br>(0.0205,<br>0.0248)        |
| Other Asian                                                            | 0.0109<br>(0.00857,<br>0.0137)   | 0.0286<br>(0.0227,<br>0.0362)  | 0.0181<br>(0.0143,<br>0.0229)               | 0.0161<br>(0.0127,<br>0.0203)               | 0.0176<br>(0.0139,<br>0.0222)                                | 0.0201<br>(0.0159,<br>0.0254)                                | 0.0135<br>(0.0107,<br>0.0171)        |
| Mixed                                                                  | 0.00581<br>(0.00226,<br>0.0148)  | 0.0162<br>(0.00632,<br>0.0409) | 0.0109<br>(0.00425,<br>0.0277)              | 0.00815<br>(0.00317,<br>0.0208)             | 0.0108<br>(0.00421,<br>0.0275)                               | 0.0125<br>(0.00487,<br>0.0317)                               | 0.00738<br>(0.00287,<br>0.0188)      |
| Other                                                                  | 0.0131<br>(0.00929,<br>0.0184)   | 0.0353<br>(0.0251,<br>0.0494)  | 0.0234<br>(0.0166,<br>0.0329)               | 0.017<br>(0.0121,<br>0.0239)                | 0.022<br>(0.0156,<br>0.0309)                                 | 0.0268<br>(0.019,<br>0.0376)                                 | 0.0168<br>(0.0119,<br>0.0236)        |
| <b>Aged 40 years or younger</b>                                        |                                  |                                |                                             |                                             |                                                              |                                                              |                                      |
| White                                                                  | 0.00949<br>(0.0079,<br>0.0114)   | 0.0278<br>(0.0232,<br>0.0333)  | 0.0277<br>(0.0231,<br>0.0332)               | 0.0187<br>(0.0156,<br>0.0224)               | 0.0276<br>(0.023,<br>0.0331)                                 | 0.0277<br>(0.0231,<br>0.0332)                                | 0.0191<br>(0.0159,<br>0.0229)        |

|                |                                  |                               |                               |                               |                               |                               |                                |
|----------------|----------------------------------|-------------------------------|-------------------------------|-------------------------------|-------------------------------|-------------------------------|--------------------------------|
| Black          | 0.0153<br>(0.0126,<br>0.0186)    | 0.0435<br>(0.0359,<br>0.0525) | 0.0434<br>(0.0358,<br>0.0525) | 0.0275<br>(0.0227,<br>0.0333) | 0.0432<br>(0.0357,<br>0.0522) | 0.0434<br>(0.0358,<br>0.0525) | 0.0239<br>(0.0197,<br>0.0289)  |
| South<br>Asian | 0.00766<br>(0.00674,<br>0.00871) | 0.0215<br>(0.0189,<br>0.0244) | 0.0214<br>(0.0188,<br>0.0243) | 0.0156<br>(0.0137,<br>0.0177) | 0.0214<br>(0.0188,<br>0.0243) | 0.0214<br>(0.0189,<br>0.0243) | 0.0169<br>(0.0149,<br>0.0192)  |
| Other<br>Asian | 0.00906<br>(0.00643,<br>0.0128)  | 0.0254<br>(0.018,<br>0.0356)  | 0.0254<br>(0.018,<br>0.0356)  | 0.0164<br>(0.0116,<br>0.0231) | 0.0253<br>(0.018,<br>0.0355)  | 0.0254<br>(0.018,<br>0.0356)  | 0.0142<br>(0.0101,<br>0.02)    |
| Mixed          | 0.0116<br>(0.00611,<br>0.0219)   | 0.0378<br>(0.02,<br>0.0703)   | 0.0378<br>(0.02,<br>0.0703)   | 0.0228<br>(0.012,<br>0.0427)  | 0.0378<br>(0.02,<br>0.0703)   | 0.0378<br>(0.02,<br>0.0703)   | 0.0196<br>(0.0103,<br>0.0368)  |
| Other          | 0.0119<br>(0.00742,<br>0.0189)   | 0.0339<br>(0.0213,<br>0.0537) | 0.0339<br>(0.0213,<br>0.0537) | 0.0181<br>(0.0113,<br>0.0288) | 0.0338<br>(0.0212,<br>0.0535) | 0.0339<br>(0.0213,<br>0.0537) | 0.0159<br>(0.00997,<br>0.0254) |

---



**ESM Table 7: Baseline characteristics of the SELDESP cohort among those with no DR on two consecutive annual screening visits and another gradable appointment**

| <b>Characteristic</b>              | <b>Number of people (%)</b> |
|------------------------------------|-----------------------------|
| <b>Total</b>                       | 79296                       |
| <b>Age categories</b>              |                             |
| <31yr                              | 2162 (2.7%)                 |
| 31 to 40yr                         | 4106 (5.2%)                 |
| 41 to 50yr                         | 12450 (15.7%)               |
| 51 to 60yr                         | 21742 (27.1%)               |
| 61 to 70yr                         | 19694 (24.8%)               |
| 71yr and over                      | 19412 (24.5%)               |
| <b>Sex</b>                         |                             |
| Female                             | 37371 (47.1%)               |
| Male                               | 41910 (52.9%)               |
| Missing                            | 15 (0.02%)                  |
| <b>Ethnicity</b>                   |                             |
| White                              | 41335 (52.1%)               |
| Black                              | 21471 (27.1%)               |
| South Asian                        | 5202 (6.6%)                 |
| Any other Asian                    | 5054 (6.4%)                 |
| Mixed                              | 2103 (2.7%)                 |
| Other                              | 2035 (2.6%)                 |
| Missing                            | 2096 (2.6%)                 |
| <b>Duration of diabetes</b>        |                             |
| Less than 10 years                 | 64845(81.8%)                |
| More than 10 years                 | 14451 (18.2%)               |
| <b>Type of diabetes</b>            |                             |
| Type 2                             | 75943 (95.8%)               |
| Type 1                             | 3017 (3.8%)                 |
| Other                              | 121 (0.15%)                 |
| Missing                            | 215 (0.27%)                 |
| <b>Deprivation (IMD quintiles)</b> |                             |
| 1                                  | 9900 (12.5%)                |
| 2                                  | 8746(11.0%)                 |
| 3                                  | 4669 (5.9%)                 |
| 4                                  | 2616 (3.3%)                 |
| 5                                  | 1789 (2.3%)                 |
| Not given                          | 51576 (65.0%)               |

**ESM Table 8: Number of appointments and number of delayed STDR if the screening protocols had been implemented in SEL DESP**

|                            | <b>Annual</b>  | <b>Biennial</b> | <b>Model 1<sup>a</sup><br/>(DESP<br/>excluding<br/>ethnicity)</b> | <b>Model 2<sup>a</sup><br/>(DESP<br/>including<br/>ethnicity)</b> | <b>Model 5<sup>a</sup><br/>(Points risk<br/>Score)</b> |
|----------------------------|----------------|-----------------|-------------------------------------------------------------------|-------------------------------------------------------------------|--------------------------------------------------------|
| Number of appointments     | 295,805 (100%) | 140,131 (47%)   | 165,768 (56%)                                                     | 162,781(55%)                                                      | 166,469 (56%)                                          |
| Number of non-delayed STDR | 2532 (100%)    | 1662 (66%)      | 1858 (73%)                                                        | 1949 (77%)                                                        | 1963 (78%)                                             |

<sup>a</sup>The models were applied to all appointments and those with the highest 20% of risk were seen annually with everyone else seen biennially

**ESM Table 9: Risk Ratio (95% CI) of STDR diagnosis per appointment under different protocols in SEL DESP**

|                                                                        | <b>Annual</b>        | <b>Biennial</b>      | <b>Model 1 (DESP<br/>excluding<br/>ethnicity)</b> | <b>Model 2 (DESP<br/>including<br/>ethnicity)</b> | <b>Model 5<br/>(Points risk<br/>Score)</b> |
|------------------------------------------------------------------------|----------------------|----------------------|---------------------------------------------------|---------------------------------------------------|--------------------------------------------|
| <b>Aged 41 years or older, less than 10 years duration of diabetes</b> |                      |                      |                                                   |                                                   |                                            |
| White                                                                  | 1 (1, 1)             | 1 (1, 1)             | 1 (1, 1)                                          | 1 (1, 1)                                          | 1 (1, 1)                                   |
| Black                                                                  | 2.33 (2.09,<br>2.59) | 2.36 (2.13,<br>2.63) | 2.43 (2.18,<br>2.70)                              | 2.13 (1.91,<br>2.37)                              | 1.96 (1.76,<br>2.18)                       |
| South Asian                                                            | 1.47 (1.22,<br>1.76) | 1.6 (1.33, 1.91)     | 1.58 (1.32,<br>1.89)                              | 1.53 (1.28,<br>1.83)                              | 1.56 (1.3,<br>1.87)                        |
| Other Asian                                                            | 1.39 (1.16,<br>1.68) | 1.53 (1.27,<br>1.83) | 1.52 (1.26,<br>1.82)                              | 1.38 (1.15,<br>1.66)                              | 1.27 (1.06,<br>1.53)                       |
| Mixed                                                                  | 1.71 (1.38,<br>2.10) | 2.03 (1.65, 2.5)     | 1.98 (1.61,<br>2.44)                              | 1.81 (1.47,<br>2.23)                              | 1.78 (1.44,<br>2.19)                       |
| Other                                                                  | 1.50 (1.20,<br>1.88) | 1.8 (1.45, 2.25)     | 1.76 (1.41,<br>2.20)                              | 1.45 (1.16,<br>1.81)                              | 1.29 (1.03,<br>1.61)                       |
| <b>Aged 41 years or older, 10 years duration of diabetes or more</b>   |                      |                      |                                                   |                                                   |                                            |
| White                                                                  | 1.64 (1.43, 1.9)     | 1.68 (1.46,<br>1.94) | 1.14 (0.99,<br>1.31)                              | 1.43 (1.24,<br>1.64)                              | 1.52 (1.32,<br>1.75)                       |
| Black                                                                  | 3.57 (3.12,<br>4.07) | 3.8 (3.33, 4.33)     | 2.68 (2.35,<br>3.06)                              | 2.56 (2.24,<br>2.92)                              | 2.46 (2.15,<br>2.8)                        |
| South Asian                                                            | 2.35 (1.93,<br>2.85) | 2.79 (2.30,<br>3.37) | 2.11 (1.74,<br>2.56)                              | 2.29 (1.89,<br>2.78)                              | 2.51 (2.07,<br>3.04)                       |
| Other Asian                                                            | 1.77 (1.41,<br>2.22) | 2.15 (1.72,<br>2.69) | 1.65 (1.32,<br>2.07)                              | 1.63 (1.30,<br>2.04)                              | 1.58 (1.26,<br>1.98)                       |
| Mixed                                                                  | 1.89 (1.48,<br>2.41) | 2.5 (1.97, 3.19)     | 2.13 (1.67,<br>2.71)                              | 2.07 (1.62,<br>2.63)                              | 2.12 (1.66,<br>2.7)                        |
| Other                                                                  | 1.78 (1.38,<br>2.28) | 2.36 (1.84,<br>3.03) | 1.98 (1.54,<br>2.55)                              | 1.87 (1.46,<br>2.40)                              | 1.89 (1.47,<br>2.42)                       |
| <b>Aged 40 years or younger</b>                                        |                      |                      |                                                   |                                                   |                                            |
| White                                                                  | 2.42 (2.05,<br>2.85) | 2.85 (2.42,<br>3.36) | 2.91 (2.47,<br>3.43)                              | 2.14 (1.81,<br>2.52)                              | 2.13 (1.81,<br>2.51)                       |
| Black                                                                  | 3.17 (2.70,<br>3.72) | 3.74 (3.20,<br>4.39) | 3.77 (3.21,<br>4.41)                              | 2.82 (2.41,<br>3.31)                              | 2.58 (2.2,<br>3.02)                        |
| South Asian                                                            | 1.95 (1.55,<br>2.45) | 2.53 (2.02,<br>3.18) | 2.44 (1.94,<br>3.06)                              | 2.17 (1.73,<br>2.72)                              | 2.25 (1.79,<br>2.82)                       |
| Other Asian                                                            | 1.97 (1.56,<br>2.48) | 2.56 (2.04,<br>3.22) | 2.46 (1.96,<br>3.09)                              | 2.11 (1.68,<br>2.66)                              | 2.02 (1.61,<br>2.54)                       |
| Mixed                                                                  | 1.77 (1.37,<br>2.28) | 2.4 (1.86, 3.09)     | 2.26 (1.75,<br>2.91)                              | 2.05 (1.59,<br>2.64)                              | 2.04 (1.58,<br>2.63)                       |
| Other                                                                  | 1.68 (1.29,<br>2.19) | 2.29 (1.76,<br>2.98) | 2.14 (1.65,<br>2.79)                              | 1.96 (1.51,<br>2.55)                              | 1.95 (1.5,<br>2.53)                        |

**ESM Table 10: Probability of STDR diagnosis per appointment in SEL DESP**

|                                                                        | <b>Annual</b>                | <b>Biennial</b>             | <b>Model 1 (DESP<br/>excluding<br/>ethnicity)</b> | <b>Model 2 (DESP<br/>including<br/>ethnicity)</b> | <b>Model 5 (Points<br/>risk Score)</b> |
|------------------------------------------------------------------------|------------------------------|-----------------------------|---------------------------------------------------|---------------------------------------------------|----------------------------------------|
| <b>Aged 41 years or older, less than 10 years duration of diabetes</b> |                              |                             |                                                   |                                                   |                                        |
| White                                                                  | 0.00351<br>(0.00323,0.00381) | 0.00968<br>(0.00891,0.0105) | 0.00888<br>(0.00817,0.00965)                      | 0.00955<br>(0.00879,0.0104)                       | 0.00962<br>(0.00886,0.0105)            |
| Black                                                                  | 0.00876<br>(0.00813,0.00943) | 0.0244<br>(0.0227,0.0262)   | 0.0231<br>(0.0215,0.0248)                         | 0.0215<br>(0.02,0.0231)                           | 0.0198<br>(0.0184,0.0213)              |
| South                                                                  | 0.00498<br>(0.00404,0.00613) | 0.0137<br>(0.0111,0.0169)   | 0.0127<br>(0.0104,0.0157)                         | 0.0131<br>(0.0106,0.0161)                         | 0.0135<br>(0.011,0.0166)               |
| Asian                                                                  | 0.0046<br>(0.00372,0.0057)   | 0.0128<br>(0.0103,0.0158)   | 0.0119<br>(0.00966,0.0148)                        | 0.0112<br>(0.00909,0.0139)                        | 0.0102<br>(0.00822,0.0126)             |
| Other                                                                  | 0.0064<br>(0.00482,0.0085)   | 0.018<br>(0.0135,0.0238)    | 0.017<br>(0.0128,0.0225)                          | 0.0153<br>(0.0115,0.0203)                         | 0.0147<br>(0.0111,0.0195)              |
| Asian                                                                  | 0.00476<br>(0.00342,0.00661) | 0.0136<br>(0.00981,0.0189)  | 0.0129<br>(0.00928,0.0179)                        | 0.00964<br>(0.00694,0.0134)                       | 0.00794<br>(0.00571,0.011)             |
| <b>Aged 41 years or older, 10 years duration of diabetes or more</b>   |                              |                             |                                                   |                                                   |                                        |
| White                                                                  | 0.00598<br>(0.00524,0.00682) | 0.0161<br>(0.0142,0.0184)   | 0.00955<br>(0.00837,0.0109)                       | 0.0133<br>(0.0116,0.0151)                         | 0.0144<br>(0.0126,0.0164)              |
| Black                                                                  | 0.0166<br>(0.0148,0.0187)    | 0.0448<br>(0.0399,0.0502)   | 0.0264<br>(0.0235,0.0296)                         | 0.0267<br>(0.0238,0.03)                           | 0.0255<br>(0.0227,0.0286)              |
| South                                                                  | 0.0127<br>(0.01,0.0161)      | 0.0337<br>(0.0267,0.0425)   | 0.0195<br>(0.0154,0.0246)                         | 0.0241<br>(0.0191,0.0305)                         | 0.0285<br>(0.0226,0.036)               |
| Asian                                                                  | 0.00722<br>(0.00509,0.0102)  | 0.0192<br>(0.0136,0.0272)   | 0.011<br>(0.00774,0.0155)                         | 0.0114<br>(0.00806,0.0162)                        | 0.0107<br>(0.00754,0.0151)             |
| Other                                                                  | 0.0116<br>(0.00735,0.0183)   | 0.0319<br>(0.0203,0.0499)   | 0.0191<br>(0.0121,0.03)                           | 0.0181<br>(0.0115,0.0284)                         | 0.0187<br>(0.0119,0.0294)              |
| Asian                                                                  | 0.00893<br>(0.00523,0.0152)  | 0.0243<br>(0.0143,0.0412)   | 0.0138<br>(0.00809,0.0235)                        | 0.0118<br>(0.00693,0.0202)                        | 0.0117<br>(0.00686,0.02)               |
| <b>Aged 40 years or younger</b>                                        |                              |                             |                                                   |                                                   |                                        |
| White                                                                  | 0.0109<br>(0.00918,0.013)    | 0.0323<br>(0.0272,0.0383)   | 0.0322<br>(0.0271,0.0382)                         | 0.0214<br>(0.018,0.0254)                          | 0.0212<br>(0.0179,0.0252)              |
| Black                                                                  | 0.0176<br>(0.015,0.0207)     | 0.0499<br>(0.0425,0.0585)   | 0.0496<br>(0.0422,0.0582)                         | 0.0321<br>(0.0273,0.0377)                         | 0.0279<br>(0.0237,0.0328)              |
| South                                                                  | 0.0105<br>(0.0073,0.015)     | 0.0304<br>(0.0212,0.0433)   | 0.0302<br>(0.0211,0.0431)                         | 0.0217<br>(0.0151,0.031)                          | 0.0232<br>(0.0162,0.0332)              |
| Asian                                                                  | 0.0111<br>(0.00766,0.0159)   | 0.0319<br>(0.0222,0.0458)   | 0.0318<br>(0.0221,0.0456)                         | 0.0201<br>(0.014,0.029)                           | 0.0174<br>(0.0121,0.0251)              |
| Other                                                                  | 0.00922<br>(0.00516,0.0164)  | 0.0274<br>(0.0153,0.0483)   | 0.0274<br>(0.0153,0.0483)                         | 0.0161<br>(0.00902,0.0286)                        | 0.0147<br>(0.00821,0.0261)             |
| Asian                                                                  | 0.00676<br>(0.0031,0.0147)   | 0.019<br>(0.00876,0.0409)   | 0.019<br>(0.00873,0.0408)                         | 0.0105<br>(0.00481,0.0227)                        | 0.00929<br>(0.00426,0.0201)            |
